1 **Title:**

2 **A Silk-Expressed Pectin Methylesterase Confers Cross-Incompatibility Between Wild and**  
3 **Domesticated Strains of *Zea mays***

4 **Authors:**

5 Yongxian Lu<sup>1</sup>, Samuel A. Hokin<sup>1</sup>, Jerry L. Kermicle<sup>2</sup>, Mathew M. S. Evans<sup>1\*</sup>

6 **Affiliations:**

7 <sup>1</sup>Department of Plant Biology, Carnegie Institution for Science, Stanford, CA 94305

8 <sup>2</sup>Laboratory of Genetics, University of Wisconsin, Madison, WI 53706

9

10 \*Correspondence to: [mevans@carnegiescience.edu](mailto:mevans@carnegiescience.edu)

11

12 **Abstract:**

13 Despite being members of the same species, some strains of wild teosinte maintain themselves as  
14 a distinct breeding population by blocking fertilization by pollen from neighboring maize plants.  
15 These teosinte strains may be in the process of evolving into a separate species, since reproductive  
16 barriers that block gene flow are critical components in speciation. This trait is conferred by the  
17 *Teosinte crossing barrier1-s (Tcb1-s)* haplotype, making *Tcb1* a speciation gene candidate. *Tcb1-*  
18 *s* contains a female gene that blocks non-self-type pollen and a male function that enables self-  
19 type pollen to overcome that block. The *Tcb1-female* gene encodes a Pectin Methylesterase,  
20 implying that modification of the pollen cell wall by the pistil is a key mechanism by which these  
21 teosinte females reject foreign (but closely related) pollen.

22

23 **One sentence summary:**

24 The *Tcb1-female* gene encodes a Pectin Methylesterase that in teosinte silks prevents fertilization  
25 by maize pollen.

26 **Short title:**

27 Reproductive isolation and mate rejection in *Zea*

28 **Main text:**

29 Maize (*Zea mays* ssp *mays*) was domesticated from annual teosinte (*Zea mays* ssp  
30 *parviglumis*) in the Balsas River valley of Mexico (1). In some locations, sympatric populations  
31 of domesticated maize and annual teosinte grow in intimate associate and flower synchronously,  
32 but rarely produce hybrids (2, 3). In sexually reproducing plants, reproductive barriers exist at  
33 different stages, including pre-pollination, post-pollination, and post-fertilization. Post-pollination  
34 barriers depend on interaction between the pollen grain and the female reproductive organs (stigma,  
35 style, and ovule). In *Zea mays*, haplotypes at three loci, *Gametophyte factor1-s* (*Ga1-s*),  
36 *Gametophyte factor2-s* (*Ga2-s*), and *Teosinte crossing barrier1-s* (*Tcb1-s*), confer Unilateral  
37 Cross-Incompatibility. While *Ga1-s* and *Ga2-s* are widespread in domesticated maize, *Tcb1-s* is  
38 almost exclusively found in wild teosinte populations. The *Tcb1-s* haplotype, like *Ga1-s* and *Ga2-*  
39 *s*, confers unilateral cross-incompatibility against varieties carrying the *tcb1* (or *gal* or *ga2*)  
40 haplotype. Viewed otherwise, *Tcb1-s* provides a pollen function that overcomes the crossing  
41 barrier. The latter view is preferred since pollen containing both *Tcb1-s* and *tcb1* haplotypes  
42 fertilizes *Tcb1-s* plants, indicating that *Tcb1-s* compatibility is not overcome by the *Tcb1-s* : *tcb1*  
43 mismatch, as is also the case for the *Ga1* and *Ga2* systems (4, 5). *Tcb1-s* was first described in

44 teosinte subspecies *mexicana* Collection 48703 from the central and southern Mexico; this strain  
45 also contained the male-only haplotype, *Gal-m*, of the *Gal* locus which together with male and  
46 female functions of *Tcb1*, make up the Teosinte Incompatibility Complex (TIC) (2, 3).

47 Collections of teosinte of both *mexicana* and *parviglumis* subspecies from the central  
48 Mexican plateau carry *Tcb1-s* (6). *Tcb1-s* confers to females the ability to block fertilization by  
49 maize (*tcb1* type) pollen by restricting pollen tube growth (7). In the reciprocal cross, teosinte  
50 pollen is able to fertilize maize, although poorly when in competition with maize pollen (3). *Tcb1*  
51 was proposed to be a candidate speciation gene contributing to isolation of diverging maize and  
52 teosinte populations, as wild teosinte populations respond to the pressure of cultivated, closely  
53 related varieties of domesticated maize (6).

54 The male and female functions of *Tcb1-s* are tightly linked but separable by recombination  
55 (7). Thus, there are four functional classes at this locus (Table S1 for gene content and origin):  
56 *Tcb1-s* has both functional male and female genes, *Tcb1-m* has only the functional male gene (6,  
57 7), *Tcb1-f* has only the functional female gene, and the *tcb1* haplotype found in almost all maize  
58 lines has neither of the two functional genes. In teosinte, *Tcb1-f* activity in the silks prevents  
59 fertilization by maize (*tcb1*) pollen, while *Tcb1-m* activity in pollen enables fertilization of *Tcb1-*  
60 *f* females (7).

61 To clone the *Tcb1* genes, fine mapping of *Tcb1-s::Col48703* haplotype was performed  
62 based on a *tcb1* backcross population with a population of approximately 15,000 chromosomes.  
63 Using maize B73 genome as a reference (8), the *Tcb1* locus was delimited to a region spanning  
64 480 kb on the short arm of chromosome 4. Within this region, there are eleven annotated genes.  
65 However, all of these were ruled out as candidates for *Tcb1* functions because they either had  
66 identical sequence with identical expression levels between *tcb1* and *Tcb1-s* haplotypes or no

67 expression in the silk or pollen in *Tcb1-s* or *tcb1* (mapping markers included in Table S2). The  
68 *Tcb1* genes, therefore, are likely absent from the maize genome. This is not surprising considering  
69 the widespread structural variations in genomes between maize lines and between teosinte  
70 populations (9).

71 To identify *Tcb1-f* knockout mutants, maize lines homozygous for the *Tcb1-s::Col48703*  
72 haplotype and carrying active *Mutator* transposons were crossed to maize inbred A195 *su1*. The  
73 progeny are expected to be heterozygous for *Tcb1-s* with *su1* approximately 6 cM away and in  
74 repulsion (3). Due to the rejection of the *tcb1* pollen (which is predominantly *su1*), about 3% of  
75 the kernels in every ear with functional *Tcb1-f* were expected to be *sugary* in this open-pollinated  
76 population, while any ears without a crossing barrier were predicted to segregate *su1* at 25%. Out  
77 of a population of approximately 6,000 individuals, two exceptional ears were found. One ear  
78 segregated for 25.6% sugary. This allele is termed *tcb1-f(KO1)*. The second isolate contained a  
79 sector of about 45 kernels within which the segregation was one-fourth sugary despite sugary  
80 segregating at ~3% over the rest of the ear. This allele is termed *tcb1-f(KO2)*. Mixed pollination  
81 tests with the progeny of both individuals show that the loss of function is heritable, and both  
82 variants fertilized a *Tcb1-s/tcb1* strain normally, indicating the retention of the male function of  
83 *Tcb1-s* (*Tcb1-f* mutated, but *Tcb1-m* intact) (Fig.1). In the case of *tcb1-f(KO2)*, progeny of seeds  
84 within the loss-of-function side of the ear inherited the knock-out, while those on the other side of  
85 the ear inherited fully functional *Tcb1-s*.

86 RNA from silks of four genotypes were subjected to short read RNA-seq. Transcript  
87 models were assembled *de novo* from the RNA-seq reads, and expression levels of genes were  
88 compared between these two knockout mutants, a standard maize inbred line W22 (genotype *tcb1*),  
89 and a functional *Tcb1-s* line (a W22 subline to which the *Tcb1-s::Col48703* haplotype had been

90 introduced by backcrossing). One gene, named here *Pertunda* (Roman fertility goddess who  
91 enables penetration, parallel to the control of pollen tube penetration in pistils), encoding a maize  
92 Pectin Methylesterase38 (PME38) homolog, was identified as a candidate for the *Tcb-f* gene.  
93 *Pertunda* is highly expressed in *Tcb1-s* silks (with a peak read depth of ~100,000) compared to the  
94 standard maize *tcb1* W22 silks, *tcb1-f(KO2)* silks (maximum read depths of ~100) and *tcb1-f(KO1)*  
95 silks (maximum read depth of ~10,000 for the 5' end and ~100 for the 3' end of the transcript  
96 model) (Fig.2 a). Based on the mRNA sequence, PCR primers were designed to isolate a BAC  
97 (Bacteria Artificial Chromosome) clone from a library we constructed from a maize line to which  
98 the *Tcb1-s::Col48703* haplotype had been introduced by backcrossing. By comparing mRNA and  
99 gene sequences, a 99-base intron was identified in *Pertunda*, which explains the gap between the  
100 two signal peaks in *Tcb1-s*. The intron region showed the same level of expression as that from  
101 the whole gene region in *tcb1-f(KO2)* and in the W22 maize line and in the downstream gene region  
102 in *tcb1-f(KO1)*. qRT-PCR confirmed this expression difference (Fig.2 b). *Pertunda* is not present  
103 in the maize B73 reference genome, which is consistent with the mapping data, and the closest  
104 homologs of *Pertunda* are located at the *gal* locus (*10*).

105 In addition to the two knockout mutants from the active *Mutator* transposon population,  
106 several additional lines derived from the *Tcb1-s::Col48703* accession have lost female barrier  
107 function. One was recovered during early backcrossing of the *Tcb1-s::Col48703* haplotype into  
108 maize (2). Mixed pollination confirmed this is a *Tcb1-male* only plant (Fig.S1). Additionally, two  
109 independent *Tcb1-s* lines were isolated in which the barrier gradually lost the strength during ten  
110 generations of backcrossing to maize and selection for *Tcb1-male* function (7). These two lines  
111 were named as *tcb1-f::silent lineage1* (*tcb1-f::sl1*) and *tcb1-f::silent lineage2* (*tcb1-f::sl2*), based  
112 on the “progressive” manner of the barrier weakening. *Pertunda* has much lower expression in

113 these three additional *tcb1* lines, as shown with qRT-PCR (Fig. 2 b). Expression of *Pertunda* was  
114 also tested on the two *Tcb1-m* recombinants from the mapping population, which have lost the  
115 *Tcb1-female* gene by recombination. Again, *Pertunda* expression was much lower than in *Tcb1-s*  
116 lines (Fig. 2 b).

117 Using a PCR-based dCAPS (Derived Cleaved Amplified Polymorphic Sequence) marker  
118 designed for the *Pertunda* gene, it was shown that *Pertunda* maps to the *tcb1* locus (Fig. S2). This  
119 marker was then tested on the fifteen closest recombinants from the mapping population of  
120 ~15,000 individuals (including four recombinants between the *Tcb1-f* and *Tcb1-m* genes) (7). Of  
121 the fifteen plants, six carried *Tcb1-f* and blocked maize pollen, and nine lacked the barrier. Results  
122 showed that all the six recombinants that carry the barrier had the *Pertunda* gene, while in all nine  
123 recombinants that are receptive to maize pollen, *Pertunda* was absent. This shows a perfect  
124 physical linkage between *Pertunda* and the *Tcb1-f* barrier function. RNA-seq data suggest that the  
125 mutation in *Pertunda* occurred somewhere in the first exon in the *tcb1-f(KO1)* mutant (Fig. 2a).  
126 PCR data confirmed there was a disruption within the coding region of *Pertunda* in *KO1* (Fig. S3).  
127 Quite differently, in *tcb1-f(KO2)* mutant silk RNA-seq reads had the same low level of expression  
128 as *tcb1* silks along the whole *Pertunda* transcript. Whole genome resequencing of both mutants  
129 identified a *Hopscotch* retrotransposon insertion in the first exon in *tcb1-f(KO1)*, close to the site  
130 where *Pertunda* expression drops sharply. PCR spanning both ends of the insertion confirmed the  
131 insertion event and the border sequences (Fig. S4). In contrast, in *tcb1-f(KO2)*, *Pertunda* was fully  
132 assembled, consistent with the PCR data that the coding region is present (Fig. S3). The *tcb1-*  
133 *f(KO2)* allele then could either be mutated in a regulatory region, potentially hundred kilobases  
134 away from the coding region, or could be an epi-allele. Similarly, no mutations were found in the  
135 coding region of *Pertunda* in the *Tcb1-m* line or the *tcb1-f::sl1* or *tcb1-f::sl2* lines described above.

136 The *tcb1-f(KO2)*, *tcb1-f::sl1*, and *tcb1-f::sl2* lines were tested for reversion to *Tcb1-s* in  
137 double mutants with *mediator of paramutation1 (mop1)* mutation. *MOP1* encodes a RNA-  
138 dependent RNA polymerase and is a key component of RNA-directed DNA Methylation (11).  
139 *mop1* mutations reactivate silenced genes and affect broad developmental programs (12). Re-  
140 activation of the *Tcb1-f* function was rare; in only ~14-22% of the *mop1* females tested, did the  
141 loss-of-function plants show some recovery of *Tcb1-f* function. Pollen competition experiments  
142 were performed for full strength *Tcb1-s* females, *tcb1* females, and the *tcb1-f* loss of function lines  
143 without sequence changes (primarily *tcb1-f(KO2)*, *tcb1-f::sl1*, and *tcb1-f::sl2*) (Fig. 3). All of the  
144 *Tcb1-s* ears tested showed strong preference for *Tcb1-s* pollen (0-7% kernels from *tcb1* pollen  
145 regardless of the ratio of the two pollen types in the mix as indicated by the neutral ear) with the  
146 kernel ratio on the test ear and control ear being different from each other at  $p < 0.0001$  (Fisher  
147 exact test) (Fig 3b). Of the 36 *mop1; tcb1-f loss of function* females tested only one had as strong  
148 of a pollen preference as full strength *Tcb1-s* females, but five had a difference between the test  
149 and control ears at  $p < 0.0001$  and an additional three females could be included if the stringency  
150 was relaxed to  $p < 0.01$  (Fig. 3b). These partial revertants included plants of lines *tcb1-f(KO2)*,  
151 *tcb1-f::sl1*, and *tcb1-f::sl2*. Of the twelve loss of function plants tested that were heterozygous  
152 wild-type for *mop1*, none of the plants passed the more stringent  $p < 0.0001$  threshold and one  
153 passed the less stringent  $p < 0.01$  threshold. It may be that maintaining the silenced derivatives of  
154 *tcb1-f* with *mop1* for multiple generations would increase the revertant frequency.

155 A subset of homozygous *mop1 tcb1-f::sl2* plants were tested at random for *Pertunda*  
156 expression in silks prior to pollination. Among the seven tested plants, one plant, yx57-13, showed  
157 about four hundred fold higher expression compared to that of the standard W22 maize and eight  
158 times higher than *tcb1-f::sl2* plants (Fig. 3C). This plant was the only one of those tested for

159 *Pertunda* expression that recovered the ability to reject *tcb1* pollen, although not as efficiently as  
160 full strength *Tcb1-s* plants, which have still higher expression of *Pertunda* than this revertant. This  
161 indicates a correlation between *Pertunda* expression level and the female barrier strength, and  
162 further supports *Pertunda* as the *Tcb1-f* gene.

163 In addition to the *Tcb1-s::Col48703* strain described above, three other teosinte-derived  
164 *Tcb1-s* lines, two from ssp. *mexicana* and one ssp. *parviglumis* (6), were tested for *Pertunda*  
165 expression in silk tissue. In all three lines, *Pertunda* expression levels are extremely high and  
166 comparable to that of the original central plateau *TIC* haplotype *Tcb1-s::Col48703* (Fig. 4).  
167 Interestingly, even though none of the modern north American maize lines tested to date carry the  
168 *Tcb1-s* haplotype, an ancient Maiz Dulce variety, Jalisco78 line 1222-2, grown at intermediate  
169 altitudes in southwestern Mexico carries *Tcb1-s* (13). This is a specialty line that may have  
170 undergone selection for cross-incompatibility factors similarly to *Gal-s* in maize popcorn lines.  
171 Whether this Maiz Dulce line acquired *Tcb1-s* from nearby teosinte populations during its origin  
172 is unknown, but maize lines from this region have been shown to have substantial introgression  
173 from *mexicana* teosintes (14). Predicted *Pertunda* coding sequences are identical in all five *Tcb1-*  
174 *s* lines: three *mexicana* accessions, one *parviglumis* accession, and the Maiz Dulce line. One  
175 Single Nucleotide Polymorphism (SNP) in the intron separates these lines into two groups: one  
176 group including the *parviglumis* line (Col104-4a) and one *mexicana* line (Col109-4a), and the  
177 other group including two *mexicana* lines (Col48703 and Col207-5d) and the Maiz Dulce line (Fig.  
178 S5).

179 The most similar gene to *Pertunda* is a candidate PME gene for *Gal-female* function. This  
180 gene, termed *ZmPME3*, was found to be expressed in the silks of *Gal-s*, but not in *gal* silks, and  
181 *ZmPME3* was located to the *Gal* mapping region(10). Alignment of the *ZmPME3* and *Pertunda*



182 show that the two PMEs differ in nine amino acids (Fig. S6). The number of polymorphisms (15  
183 of 1296 nucleotides) between *Pertunda* and *ZmPME3* suggests that these two genes diverged  
184 approximately 175,000 years ago, well before the split between the *mexicana* and *parviglumis*  
185 subspecies of teosinte and just before the split between *Zea mays parviglumis* and *Zea luxurians*,  
186 using calculated nucleotide substitution rates for maize (15) and a calculated time since the split  
187 between *mexicana* and *parviglumis* of ~60,000 years and *parviglumis* and *luxurians* of ~140,000  
188 years (16). It will be interesting to test whether the *Tcb1-male* and *Gal-male* genes diverged at a  
189 similar time, suggesting they were already adjacent before divergence.

190 The *Tcb1* and *Gal* barriers may share a similar mechanism, but because they are mostly  
191 cross-incompatible with one another they likely differ in their interacting partners. However,  
192 *Tcb1-s* and *Gal-s* are not fully cross-incompatible. In situations where pollen rejection is not  
193 absolute, *Tcb1-s* pollen has a competitive advantage over *tcb1* pollen on *Gal-s* or *Ga2-s* silks.  
194 This is true for all combinations of interactions between crossing barrier loci (3, 5) and is  
195 consistent with them encoding related proteins, although the behavior of pollen tubes during  
196 rejection by each system is slightly different (7). *Pertunda* encodes a group 1 type of PME without  
197 an N-terminal Pectin Methyl-esterase Inhibitor (PMEI) domain (17), and contains a predicted signal  
198 peptide, so it has the potential to be secreted and interact directly with the pollen tube to remove  
199 methyl-esters from the pectin wall of the pollen tube. Esterified pectins are typically associated  
200 with the tip of the growing pollen tube, while de-esterified pectins are enriched distally, and there  
201 is a correlation between pectin de-esterification and increased cell wall stiffness (18). Pollen tubes  
202 have a “soft tip-hard shell” structure, in that the tip region of the tube cell wall has a single pectin  
203 layer that is strong enough to withstand turgor pressure, but plastic enough to allow cell expansion  
204 and growth (19). Inside pollen tubes, pectin is synthesized and esterified in Golgi compartments

205 before delivery to the tip cell wall via vesicle trafficking (20), where it can be de-esterified by  
206 PME (21). Pollen cells finely tune the stiffness of the tip cell wall to sustain pollen tube elongation.  
207 Either under- or over-supply of PME activity can result in disturbed pollen tube growth and  
208 compromised male fertility (22-25). The PERTUNDA (and ZMPME3) protein falls into the Plant  
209 1a clade of mature PME enzymes (26) (Fig. S7).

210 In summary, genetic and genomic data identify *Pertunda* as the *Tcb1-female* barrier gene.  
211 Teosinte lines carrying *Pertunda* block maize pollen that lacks the male function provided by  
212 *Tcb1-m*. That the *Tcb1-f* gene encodes a cell wall modifying enzyme is consistent with the model  
213 that incompatibility with *tcb1* occurs via incongruity rather than active targeting of a *Tcb1-m*  
214 encoded protein (4). It will be interesting to test how universal this barrier mechanism is among  
215 sexual reproducing plants. Surprisingly, it was shown that another PME family member is encoded  
216 by the *Gal-male* gene (27) (in a very distinct clade, Plant X2, of PME enzymes), raising the  
217 possibility that the biochemical barrier to pollen and the ability of pollen to overcome that barrier  
218 are conferred by different classes of PME proteins.

219 The grass family is known to have widely distributed self-incompatibility (SI) among  
220 species, however, the molecular nature of the SI genes and how it is related to interspecific cross-  
221 incompatibility are not known (28, 29). The grasses also have an unusually high species diversity  
222 for a family with abiotic pollinators (30). Identification of the *Tcb1-female* gene may facilitate  
223 research into the mechanisms of speciation in the grasses. Agriculturally, this work may help  
224 managing specialty crop populations by preventing pollen contamination. It may also facilitate  
225 development of breeding tools to enrich crop genetic pools by backcrossing crops to their ancestors  
226 for the purposes of yield increase or enhanced stress resistance.

227

228

229

230 **References and Notes:**

231

- 232 1. Y. Matsuoka *et al.*, A single domestication for maize shown by multilocus microsatellite  
233 genotyping. *Proc Natl Acad Sci U S A* **99**, 6080-6084 (2002).
- 234 2. J. L. Kermicle, J. O. Allen, Cross-Incompatibility between Maize and Teosinte. *Maydica*  
235 **35**, 399-408 (1990).
- 236 3. M. M. S. Evans, J. L. Kermicle, Teosinte crossing barrier1, a locus governing hybridization  
237 of teosinte with maize. *Theoretical and Applied Genetics* **103**, 259-265 (2001).
- 238 4. J. L. Kermicle, M. M. S. Evans, Pollen-pistil barriers to crossing in maize and teosinte  
239 result from incongruity rather than active rejection. *Sex Plant Reprod* **18**, 187-194 (2005).
- 240 5. J. L. Kermicle, M. M. S. Evans, The *Zea mays* sexual compatibility gene *ga2*: naturally  
241 occurring alleles, their distribution, and role in reproductive isolation. *J Hered* **101**, 737-  
242 749 (2010).
- 243 6. J. L. Kermicle, A selfish gene governing pollen-pistil compatibility confers reproductive  
244 isolation between maize relatives. *Genetics* **172**, 499-506 (2006).
- 245 7. Y. Lu, J. L. Kermicle, M. M. Evans, Genetic and cellular analysis of cross-incompatibility  
246 in *Zea mays*. *Plant reproduction* **27**, 19-29 (2014).
- 247 8. Y. Jiao *et al.*, Improved maize reference genome with single-molecule technologies.  
248 *Nature* **546**, 524-527 (2017).
- 249 9. R. A. Swanson-Wagner *et al.*, Pervasive gene content variation and copy number variation  
250 in maize and its undomesticated progenitor. *Genome Res* **20**, 1689-1699 (2010).
- 251 10. A. N. Moran Lauter, M. G. Muszynski, R. D. Huffman, M. P. Scott, A Pectin  
252 Methylesterase *ZmPme3* Is Expressed in Gametophyte factor1-s (*Ga1-s*) Silks and Maps  
253 to that Locus in Maize (*Zea mays* L.). *Front Plant Sci* **8**, 1926 (2017).
- 254 11. M. Alleman *et al.*, An RNA-dependent RNA polymerase is required for paramutation in  
255 maize. *Nature* **442**, 295-298 (2006).
- 256 12. J. E. Dorweiler *et al.*, mediator of paramutation1 is required for establishment and  
257 maintenance of paramutation at multiple maize loci. *Plant Cell* **12**, 2101-2118 (2000).
- 258 13. Z. G. Jones, M. M. Goodman, M. D. Krakowsky, Identification of maize-derived dominant  
259 gametophyte factors. *Euphytica* **209**, 63-69 (2016).
- 260 14. J. van Heerwaarden *et al.*, Genetic signals of origin, spread, and introgression in a large  
261 sample of maize landraces. *Proc Natl Acad Sci U S A* **108**, 1088-1092 (2011).
- 262 15. R. M. Clark, S. Tavare, J. Doebley, Estimating a nucleotide substitution rate for maize from  
263 polymorphism at a major domestication locus. *Mol Biol Evol* **22**, 2304-2312 (2005).
- 264 16. J. Ross-Ibarra, M. Tenailon, B. S. Gaut, Historical divergence and gene flow in the genus  
265 *Zea*. *Genetics* **181**, 1399-1413 (2009).
- 266 17. J. Pelloux, C. Rusterucci, E. J. Mellerowicz, New insights into pectin methylesterase  
267 structure and function. *Trends Plant Sci* **12**, 267-277 (2007).

- 268 18. E. Parre, A. Geitmann, Pectin and the role of the physical properties of the cell wall in  
269 pollen tube growth of *Solanum chacoense*. *Planta* **220**, 582-592 (2005).
- 270 19. M. W. Steer, J. M. Steer, Tansley Review No 16 Pollen-Tube Tip Growth. *New Phytologist*  
271 **111**, 323-358 (1989).
- 272 20. A. Y. Cheung, H. M. Wu, Structural and signaling networks for the polar cell growth  
273 machinery in pollen tubes. *Annu Rev Plant Biol* **59**, 547-572 (2008).
- 274 21. F. Micheli, Pectin methylesterases: cell wall enzymes with important roles in plant  
275 physiology. *Trends Plant Sci* **6**, 414-419 (2001).
- 276 22. M. Bosch, A. Y. Cheung, P. K. Hepler, Pectin methylesterase, a regulator of pollen tube  
277 growth. *Plant Physiol* **138**, 1334-1346 (2005).
- 278 23. G. W. Tian, M. H. Chen, A. Zaltsman, V. Citovsky, Pollen-specific pectin methylesterase  
279 involved in pollen tube growth. *Dev Biol* **294**, 83-91 (2006).
- 280 24. N. Rockel, S. Wolf, B. Kost, T. Rausch, S. Greiner, Elaborate spatial patterning of cell-  
281 wall PME and PME1 at the pollen tube tip involves PME1 endocytosis, and reflects the  
282 distribution of esterified and de-esterified pectins. *Plant J* **53**, 133-143 (2008).
- 283 25. A. Sanati Nezhad, M. Packirisamy, A. Geitmann, Dynamic, high precision targeting of  
284 growth modulating agents is able to trigger pollen tube growth reorientation. *Plant J* **80**,  
285 185-195 (2014).
- 286 26. O. Markovic, S. Janecek, Pectin methylesterases: sequence-structural features and  
287 phylogenetic relationships. *Carbohydr Res* **339**, 2281-2295 (2004).
- 288 27. Z. Zhang *et al.*, A PECTIN METHYLESTERASE gene at the maize Gal1 locus confers  
289 male function in unilateral cross-incompatibility. *Nat Commun* **9**, 3678 (2018).
- 290 28. J. Heslop-Harrison, Pollen-stigma interaction and cross-incompatibility in the grasses.  
291 *Science* **215**, 1358-1364 (1982).
- 292 29. B. Yang, D. Thorogood, I. Armstead, S. Barth, How far are we from unravelling self-  
293 incompatibility in grasses? *New Phytol* **178**, 740-753 (2008).
- 294 30. M. E. Dodd, J. Silvertown, M. W. Chase, Phylogenetic Analysis of Trait Evolution and  
295 Species Diversity Variation among Angiosperm Families. *Evolution* **53**, 732-744 (1999).
- 296 31. H. Wilkes, Teosinte: the closest relative of maize. *Bussey Institution of Harvard University,*  
297 *Cambridge, Massachusetts*, (1967).
- 298 32. M. M. S. Evans, J. L. Kermicle, Teosinte crossing barrier1, a locus governing hybridization  
299 of teosinte with maize. *Theoretical and Applied Genetics* **103**, 259-265 (2001).
- 300 33. M. G. Grabherr *et al.*, Full-length transcriptome assembly from RNA-Seq data without a  
301 reference genome. *Nat Biotechnol* **29**, 644-652 (2011).
- 302 34. A. Bankevich *et al.*, SPAdes: a new genome assembly algorithm and its applications to  
303 single-cell sequencing. *J Comput Biol* **19**, 455-477 (2012).
- 304 35. T. D. Wu, S. Nacu, Fast and SNP-tolerant detection of complex variants and splicing in  
305 short reads. *Bioinformatics* **26**, 873-881 (2010).
- 306 36. J. P. Huelsenbeck, F. Ronquist, MRBAYES: Bayesian inference of phylogenetic trees.  
307 *Bioinformatics* **17**, 754-755 (2001).

308

309

310

311 **Acknowledgements:**

312 The authors would like to thank Kathy Barton for the support that kept this project alive,  
313 encouragement, and insight and members of the Evans and Barton labs past and present for helpful  
314 discussions. We would also like to thank Beverly Oashgar for help with the screen for loss-of-  
315 function mutants and David Heller, Lance Cabalona, Clayton Coker, Amber Glowacki, and  
316 Hannah Vahldick for help growing plants and making crosses. We would also like to thank Jeffrey  
317 Ross-Ibarra for help in calculating the divergence time between *ZmPME3* and *Pertunda*. The  
318 authors declare that they have no competing interests in this work. This work was supported by  
319 National Science Foundation Award number IOS-0951259 and by United States Department of  
320 Agriculture-National Research Initiative Competitive Grants Program Award number 35301-  
321 13314.

322

323 **Supplementary Materials:**

324 Materials and Methods

325 Figures S1-S7

326 Tables S1-S2

327 References (31-36)

328

329 **Fig. 1.** Mixed pollination test of the *Tcb1-f* mutants. (A) scheme of the experiment: Two pollen  
330 donor lines and three pollen receiver lines were used. Pollen from a *tcb1; R1-self color* maize line  
331 (purple circles), produces purple kernels, while pollen from test plants (yellow circles) produces

332 white or yellow kernels. Pollen from the two donors was mixed and put on three receiving ears:  
333 (1) *Tcb1-s* ears to verify the *Tcb1-male* function from the *KO* line; (2) *tcb1-f(KO)* ears to test the  
334 presence/absence of the female barrier in the knockout mutant individuals; and (3) a maize (*tcb1*;  
335 *r1*) neutral ear to identify the ratio of viable pollen grains from the two donors in the mixture. (B)  
336 Ears from the three pollen recipients for the *tcb1-f(KO1)* test. (C) Ears from the three pollen  
337 recipients for the *tcb1-f(KO2)* test. In both tests, pollen from the *KO* plants successfully fertilized  
338 the *Tcb1-s* ear (left ear in B and C), while the ears from *KO* plants showed no barrier to *tcb1* maize  
339 pollen with a similar frequency of purple kernels on mutant ears and the neutral test ears (middle  
340 and right ears in B and C).

341 **Fig. 2.** Gene expression profiling identifies *Pertunda* as a *Tcb1-f* candidate gene. RNA samples  
342 collected from silks of different genotypes was analyzed by RNA-Seq and RT-PCR. (A) *Pertunda*  
343 gene structure is shown above the graph (solid line indicates single intron), and RNA-Seq read  
344 depth is shown for the *Pertunda* gene. (B) *Pertunda* gene expression, compared to *tubulin* levels  
345 as a control, as measured by qRT-PCR in a variety of loss-of-function *Tcb1-s* lines: *Tcb1-s*, full  
346 strength *Tcb1-s* barrier line; *tcb1-f(KO1)* and *tcb1-f(KO2)*, two loss-of-function alleles from a  
347 *Mutator* transposon mutagenesis; *Tcb1-m*, a spontaneous *Tcb1-male* only line; *tcb1-f::silent*  
348 *lineage1* and *tcb1-f::silent lineage2*; and *K452-13* and *J456-13*, two *Tcb1-male* only lines that lost  
349 *Tcb1-f* by recombination.

350

351 **Fig. 3.** Reversion of *tcb1-f* loss-of-function. (A) Revertant ear (marked by asterisk in B and C)  
352 pollinated by a mix of *tcb1*; *R1-sc* and *Tcb1-m*; *r1* pollen showing higher frequency of yellow  
353 kernels on the test ear than the *tcb1* control ear. (B) Results of mixed pollination tests on four  
354 genotypes: *tcb1*, *Tcb1-s*, *tcb1-f(loss-of-function(lof))* alleles, and *tcb1-f(lof) mop1* double mutants.

355 The percentage of kernels from *tcb1* pollen on the test ear are plotted on the x-axis and the  
356 percentage of kernels from *tcb1* pollen on the control *tcb1* ear on the y-axis. Equal percentages in  
357 the two ears indicates no barrier (line with slope=1). Red circles indicate ears with significantly  
358 fewer *tcb1* kernels in the test ear vs. the control ear at  $p < 0.0001$  and blue circles at  $0.0001 < p < 0.01$ .  
359 The loss-of-function line is indicated for each revertant. (C) *Pertunda* gene expression level and  
360 barrier strength. Barrier strength is expressed as the ratio of kernels from *Tcb1-s* vs *tcb1* pollen on  
361 the test ear vs. the control *tcb1* ear (Columns), with a fraction of 1.0 indicating no barrier and  
362 significantly higher values a functional barrier. *Pertunda* RNA levels are expressed as relative to  
363 the *tubulin* control gene (Orange Line).

364 **Fig.4.** Expression of *Pertunda* in different *Tcb1-s* lines collected in different locations in Mexico  
365 (6). W22 is a standard maize *tcb1* line, *Tcb1-s::Col48703*, *Tcb1-s::109-4a*, and *Tcb1-s::207-5d*  
366 are three independent collections of *Zea mays ssp. mexicana* tesointe lines; *Tcb1-s::104-4a*, a  
367 *Zea mays ssp. parviglumis* line; and DGF1222-2 from Maiz Dulce, an ancient Mexican maize  
368 sweet corn variety (13).

369

370

371

372 **Figures and Legends**

373

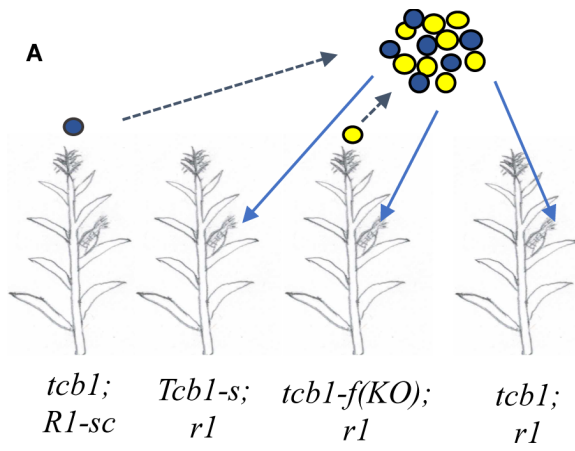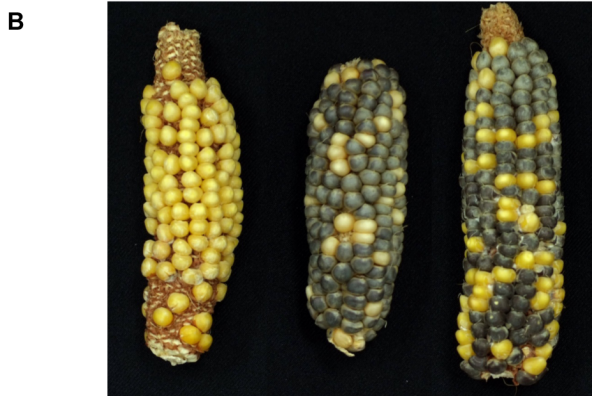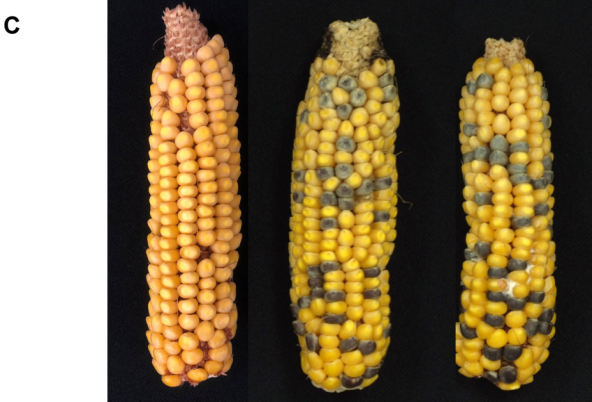

374

375

376



377 **Fig. 1.** Mixed pollination test of the *Tcbl-f* mutants. (A) scheme of the experiment: Two pollen  
378 donor lines and three pollen receiver lines were used. Pollen from a *tcb1; R1-self color* maize line  
379 (purple circles), produces purple kernels, while pollen from test plants (yellow circles) produces  
380 white or yellow kernels. Pollen from the two donors was mixed and put on three receiving ears:  
381 (1) *Tcbl-s* ears to verify the *Tcbl-male* function from the *KO* line; (2) *tcb1-f(KO)* ears to test the  
382 presence/absence of the female barrier in the knockout mutant individuals; and (3) a maize (*tcb1;*  
383 *r1*) neutral ear to identify the ratio of viable pollen grains from the two donors in the mixture. (B)  
384 Ears from the three pollen recipients for the *tcb1-f(KO1)* test. (C) Ears from the three pollen  
385 recipients for the *tcb1-f(KO2)* test. In both tests, pollen from the *KO* plants successfully fertilized  
386 the *Tcbl-s* ear (left ear in B and C), while the ears from *KO* plants showed no barrier to *tcb1* maize  
387 pollen with a similar frequency of purple kernels on mutant ears and the neutral test ears (middle  
388 and right ears in B and C).

389

390

391

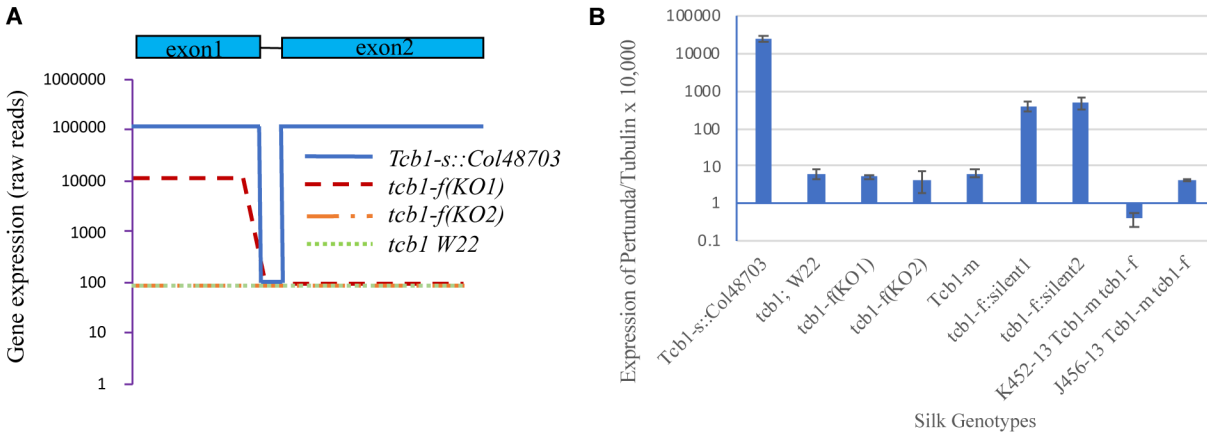

392

393

394

395

396 **Fig. 2.** Gene expression profiling identifies *Pertunda* as a *Tcb1-f* candidate gene. RNA samples  
397 collected from silks of different genotypes was analyzed by RNA-Seq and RT-PCR. (A) *Pertunda*  
398 gene structure is shown above the graph (solid line indicates single intron), and RNA-Seq read  
399 depth is shown for the *Pertunda* gene. (B) *Pertunda* gene expression, compared to *tubulin* levels  
400 as a control, as measured by qRT-PCR in a variety of loss-of-function *Tcb1-s* lines: *Tcb1-s*, full  
401 strength *Tcb1-s* barrier line; *tcb1-f(KO1)* and *tcb1-f(KO2)*, two loss-of-function alleles from a  
402 *Mutator* transposon mutagenesis; *Tcb1-m*, a spontaneous *Tcb1-male* only line; *tcb1-f::silent*  
403 *lineage1* and *tcb1-f::silent lineage2*; and *K452-13* and *J456-13*, two *Tcb1-male* only lines that lost  
404 *Tcb1-f* by recombination.

405

406

407

408

409

410

411 **Fig. 3.** Reversion of *tcb1-f* loss-of-function. (A) Revertant ear (marked by asterisk in B and C)  
 412 pollinated by a mix of *tcb1*; *R1-sc* and *Tcb1-m*; *r1* pollen showing higher frequency of yellow  
 413 kernels on the test ear than the *tcb1* control ear. (B) Results of mixed pollination tests on four  
 414 genotypes: *tcb1*, *Tcb1-s*, *tcb1-f(loss-of-function(lof))* alleles, and *tcb1-f(lof) mop1* double mutants.  
 415 The percentage of kernels from *tcb1* pollen on the test ear are plotted on the x-axis and the  
 416 percentage of kernels from *tcb1* pollen on the control *tcb1* ear on the y-axis. Equal percentages in  
 417 the two ears indicates no barrier (line with slope=1). Red circles indicate ears with significantly  
 418 fewer *tcb1* kernels in the test ear vs. the control ear at  $p < 0.0001$  and blue circles at  $0.0001 < p < 0.01$ .  
 419 The loss-of-function line is indicated for each revertant. (C) *Pertunda* gene expression level and  
 420 barrier strength. Barrier strength is expressed as the ratio of kernels from *Tcb1-s* vs *tcb1* pollen on  
 421 the test ear vs. the control *tcb1* ear (Columns), with a fraction of 1.0 indicating no barrier and  
 422 significantly higher values a functional barrier. *Pertunda* RNA levels are expressed as relative to  
 423 the *tubulin* control gene (Orange Line).

424

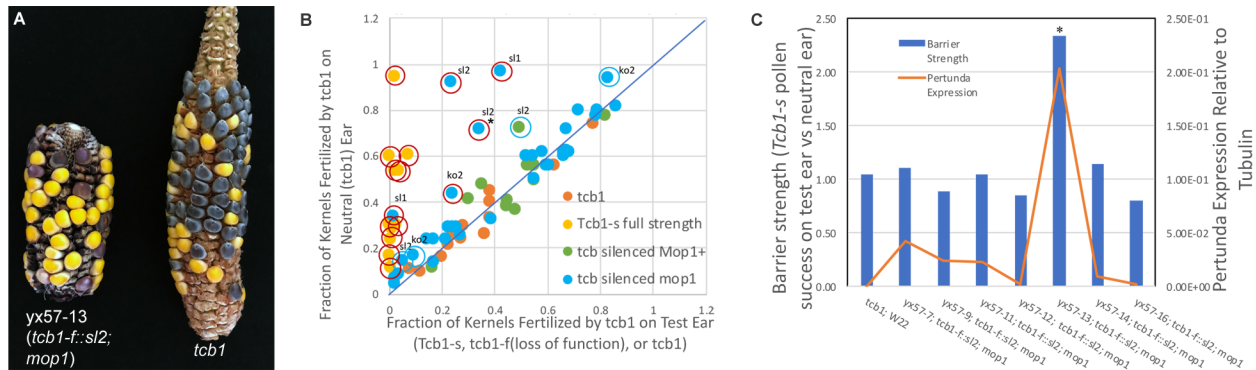

425

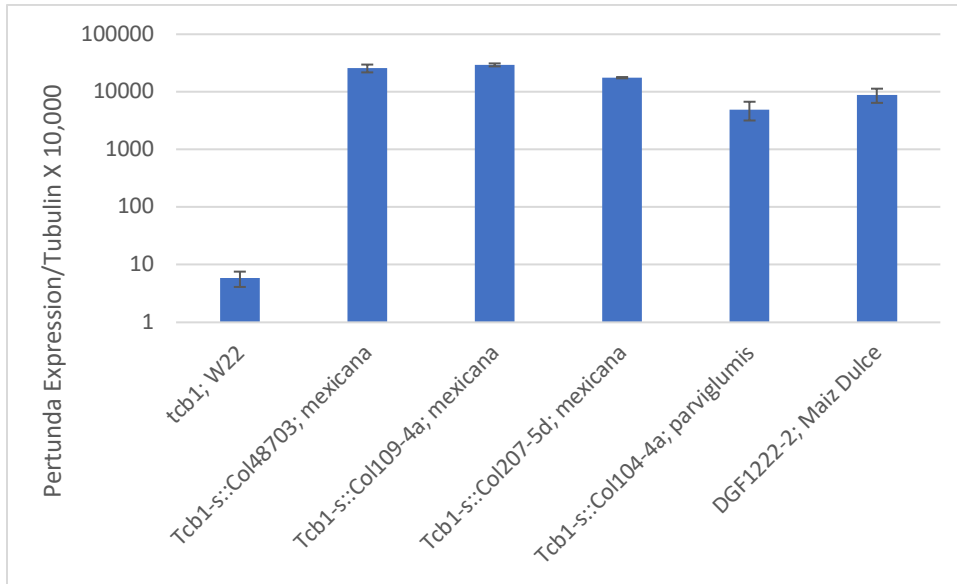

426

427

428 **Fig.4.** Expression of *Pertunda* in different *Tcb1-s* lines collected in different locations in Mexico  
429 (6). W22 is a standard maize *tcb1* line, *Tcb1-s::Col48703*, *Tcb1-s::109-4a*, and *Tcb1-s::207-5d*  
430 are three independent collections of *Zea mays ssp. mexicana* tesointe lines; *Tcb1-s::104-4a*, a *Zea*  
431 *mays ssp. parviglumis* line; and DGF1222-2 from Maiz Dulce, an ancient Mexican maize sweet  
432 corn variety (13).

433

434

435

436

437

438

## Supplementary Materials for

439

440 **A Silk-Expressed Pectin Methyltransferase Confers Cross-Incompatibility Between Strains of**

441

*Zea mays*

442

443

444 Yongxian Lu<sup>1</sup>, Samuel A. Hokin<sup>1</sup>, Jerry L. Kermicle<sup>2</sup>, Mathew M. S. Evans<sup>1</sup>

445

Correspondence to: [mevans@carnegiescience.edu](mailto:mevans@carnegiescience.edu)

446 **This PDF file includes:**

447 Materials and Methods

448 Figs. S1 to S7

449 Tables S1 to S2

450

451

452

## 453 **Materials and Methods**

### 454 Maize and teosinte lines and growth conditions

455 All maize and teosinte lines used in this study have been described previously (3, 6, 7, 13). Plants  
456 were grown under field conditions at either Stanford, California or Madison, Wisconsin.

### 457 *Tcb1-s* mapping

458 As described before (3), a Central Plateau teosinte collection 48703 (31) carrying the *Tcb1-s*  
459 barrier was backcrossed to the Mid-western US dent inbred W22 to incorporate the *Tcb1-s* locus  
460 into a maize background. This *Tcb1-s* strain was crossed to a chromosome 4 maize tester line  
461 *virescent17 (v17) brown midrib3 (bm3) sugary1 (su1)*, and the F1 was then backcrossed to the  
462 same tester line. Recombinants carrying crossovers between the four visual markers were tested  
463 for the *Tcb1-s* male and female functions in reciprocal crosses with *Tcb1-s/su1* F1 plants. PCR  
464 mapping markers were developed to refine the location of crossovers in these recombinants

### 465 *Tcb1-f* knockout mutant screen

466 To identify loss-of-function mutants of *Tcb1-female*, a *Gal-m Tcb1-s* active *Mutator* strain was  
467 crossed to maize inbred A195 *su1 (tcb1)*, and then the progeny were grown as an open-pollinated  
468 block. Most of the progeny are expected to be heterozygous for *Tcb1-s* and *su1* in repulsion with  
469 *su1* approximately 6 cM away from the *tcb1* locus (32). Due to the rejection of the *tcb1* pollen  
470 (which is predominantly *su1*), about 3% of the kernels in every ear with functional *Tcb1-f* are  
471 expected to be *sugary* in this open-pollinated population, while those without a crossing barrier  
472 were predicted to segregate *su1* at 25%.

473

474 Mixed pollination experiments

475 For the mixed pollination testing of the two *tcb1-f* knockout mutants, two pollen donor lines and  
476 three pollen receiver lines were used. Pollen from a maize line (*tcb1*) that does not have the *Tcb1*  
477 barrier genes but carries the endosperm color marker *R1-self color* (*R1-sc*) will produce purple  
478 kernel after fertilization of the lines used, while pollen from the knockout plants and the *Tcb1-m*  
479 plants carry *r1-r* and produce anthocyaninless kernels that are white or yellow. After being  
480 collected from the two donors and mixed, pollen was put on the three receiving ears: (1) a *Tcb1-s*  
481 tester ear was used to verify the presence of the *Tcb1* male function from the *tcb1-f::KO* pollen;  
482 (2) the *tcb1-f(KO)* ear was used to test the presence/absence of the female barrier function in the  
483 knockout mutant; and (3) a maize (*tcb1*) neutral ear was used to assay the percentage of viable  
484 pollen grains from the two donors in the mixture. The same protocol was used on the spontaneous  
485 *Tcb1-m* plant, except the *Tcb1-m* plant being tested was substituted for the *KO* plant. For mixed  
486 pollinations of the *tcb1-f::silent lineage mop1* double mutant plants, pollen from the same *R1-sc*  
487 *tcb1* line and a *r1-r Tcb1-s* tester line was collected, mixed, and applied to the individual silent  
488 line ears and the neutral maize ears.

489 Silk tissue collection, RNA isolation and cDNA synthesis

490 Plants for RNA isolation were grown in summer field conditions in Stanford, CA. Silk tissues were  
491 collected around 11 am, immediately put into liquid nitrogen in the field, and stored at -80°C. Total  
492 RNA was isolated from silks with Trizol reagent (Invitrogen), DNase-treated, and either subjected  
493 to Illumina short read paired end RNA-seq, or used to synthesize the 1st strand cDNA with the  
494 Superscript IV RT kit (Invitrogen).

495 Quantitative RT-PCR

496 Each line/genotype had three biological replicates, and each in turn had three technical repeats.  
497 Tubulin (Zm00001d033850) was used as a reference gene. In each line, relative expression level  
498 of *Pertunda* was obtained by comparing *Pertunda* to tubulin.

#### 499 Sequencing, assembly and analysis

500 All the RNA and DNA sequencing works were done with Illumina Paired-end sequencing by  
501 Novogene (CA, USA). RNA-seq reads from all samples were combined and *de novo* assembled  
502 with Trinity v2.4.0.(33) The gene in contig DN33598\_c7\_g3\_i1 was identified as the *Tcb1-f*  
503 candidate gene due to its extremely high expression in the functional *Tcb1-s* line and the almost  
504 no expression in the *KO* mutants and a standard W22 maize line. PCR primers were designed  
505 based on the DN33598\_c7\_g3\_i1 sequence, and one BAC clone was fished out from library made  
506 from maize line into which the *Tcb1-s::Col48703* haplotype had been introgressed. The BAC  
507 sequencing reads were assembled with SPAdes v3.11.1.(34) NODE\_62, a contig that is 13656 bp  
508 with coverage of 4029, was identified as having the *Tcb1-f* candidate gene. Whole genome  
509 sequencing reads from the two *KO* mutants were individually assembled with SPAdes v3.11.1 and  
510 BLASTed against NODE\_62. Also, the mutant sequencing reads were mapped against NODE\_62  
511 using GSNAP (35). Combining both approaches identified the *hopscotch* retrotransposon insertion  
512 in the *tcb1-f(KO1)* mutant allele.

513 For phylogenetic analyses, alignments were made using the ClustalW algorithm in MegAlign  
514 (DNASTAR). The predicted mature PME enzymes and the Arabidopsis PME family members  
515 were taken from Markovic and Janecek, as were the subfamily designations (26). Phylogenies  
516 were produced from these alignments using MrBayes v3.2.0 using default settings for amino acid  
517 analysis (36). The MrBayes analysis was performed for 4,100,000 generations at which point the  
518 standard deviation of the split frequencies was below 0.004.



519 **Supplementary Figures**

520

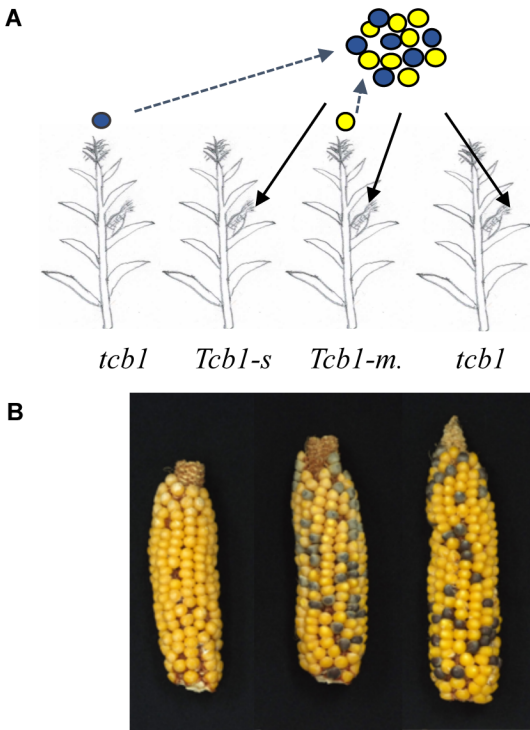

521

522 **Fig. S1.** Mix pollination testing the spontaneous *Tcb1-m* plant. a. scheme of the experiment: Details  
523 in “Method” section. b. ears from the three pollen receivers for *Tcb1-m* plant test. Pollen from the  
524 *Tcb1-m* plant successfully fertilized the *Tcb1-s* ear and produced yellow kernels (left ear in b),  
525 while the ears from *Tcb1-m* plant indeed had lost the barrier to block maize pollen as shown by the  
526 purple kernels produced by *tcb1* pollen on the ears (middle ear in b).

527

528

529

530

531

532

533

534

535

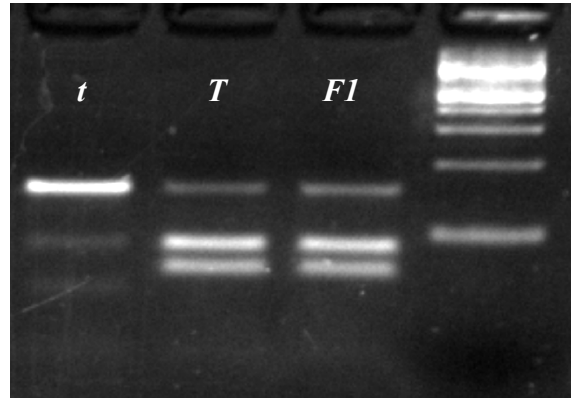

534

535

536 **Fig. S2.** A dCAPS marker to test presence/absence of *Pertunda* in recombinants from the  
537 mapping population. The Marker was designed in the way that only the PCR amplicon from the  
538 *Tcb1* genomic DNA (*T*), but not the unspecific PCR product amplified from the maize genomic  
539 DNA (*t*) would be cut by the enzyme Hae III. after PCR and enzyme digestion.

540

541

542

543

544

545

546

547

548

549

550

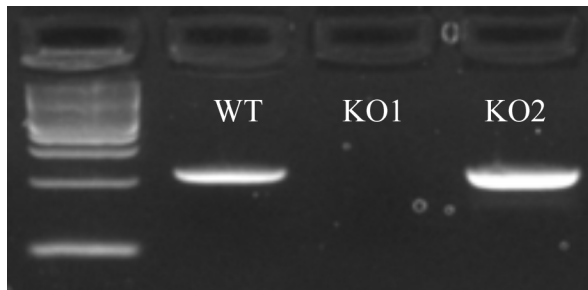

551

552

553 **Fig. S3.** PCR detection of *Pertunda* in the two *tcb1-f(KO)* mutants. PCR primers spanning the  
554 possible mutation site in the *tcb1-f(KO1)* was designed and tested on the *Tcb1-s* (WT), *tcb1-f(KO1)*  
555 and *tcb1-f(KO2)*. Using *tcb1-f(KO1)* genomic DNA as template failed to produce amplicon, while  
556 *Pertunda* can be detected in the *tcb1-f(KO2)* mutant.

557

558

559

560

561

562

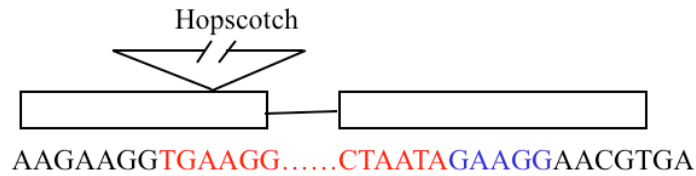

563 **Fig. S4.** Identification of the mutation in the *tcb1-f(KO1)* mutant. Whole genome resequencing

564 showed a Hopscotch retrotransposon insertion in the first exon. PCR primers based on the gene

565 and the retrotransposon were used to confirm the insertion and the border sequences. Black bases,

566 *Pertunda* gene sequence; Red bases, retrotransposon sequence; Blue bases, bases duplicated from

567 the left border leading the retrotransposon sequence.

568

569

570

```
571 Col104-4a parviglumis ACAGTGAGTGAGTAACTCTGCCGATCGATATTTCACTGCAGTTGAG...
572 Col109-4a mexicana ACAGTGAGTGAGTAACTCTGCCGATCGATATTTCACTGCAGTTGAG...
573 Col48703 mexicana ACAGTGAGTGAGTAACTGTGCCGATCGATATTTCACTGCAGTTGAG...
574 Col207-5d mexicana ACAGTGAGTGAGTAACTGTGCCGATCGATATTTCACTGCAGTTGAG...
575 Maiz Dulce ACAGTGAGTGAGTAACTGTGCCGATCGATATTTCACTGCAGTTGAG...
576 *****
577 *****
```

578 **Fig. S5.** Partial DNA alignment of the *Pertunda* gene intron between the different *Tcb1-s* lines.

579 Collections 109-4a, 48703 and 207-5d, ssp. *mexicana* teosintes; Collection104-4a, ssp.

580 *parviglumis* teosinte; DGF1222, a traditional maize Dulce sweetcorn variety from Mexico (13).

581

582

583

```
584 PERTUNDA MVGGVRRRCGLGLAMAVALLLLAALVVVASGGAETRQKLPAGSGNDDDHAAVLSRLSNVIDP
585 ZmPME3 MVGGVRRRCGLGLAMAVALLLLAALVVVASGGAEMRQKLPAGSGNDDDHAAVLSRLSNVIDP
586 *****
587
588 PERTUNDA PGSWPPRADAVVAKRCRGVAAPPPCYTSIQAAVDHAPAPQEAEEVEDKYVVHVLAGVYDE
589 ZmPME3 PGSWPPRADAVVAKRCGGVAAPPPCYTSIQAALKAASAPQEAEEVEDKYVVHVLAGVYDE
590 *****: . * *****
591
592 PERTUNDA TVNITRRNVMLIGDVGATVITGNKSNATGVHMDMTATVNALGHGFIAQNLTIRNTAGPE
593 ZmPME3 TVNITRRNVMLIGDVGATVITGNKSNATGVHMDMTATVNALGHGFIAQNLTIRNTAGPD
594 *****:
595
596 PERTUNDA GRQAVALRSNSNKSVMYWCSEIEGHEDTLYVENGIQFYLQTSIWGTVDFVFGNAQAMFQSC
597 ZmPME3 GRQAVALRSNSNKSVMYCCSEIEGHEDTLYVENGIQFYLQTSIWGTVDFVFGNAQAMFQSC
598 *****
599
600 PERTUNDA ALLVRRPPKGGKHNVLTAQGCNNASRESGFSFHMCTVEAAPGVLDLGVETYLGRPYRNFSH
601 ZmPME3 ALLVRRPPKGGKHNVLTAQGCNNASRESGFSFHMCTVEAAPGVLDLGVETYLGRPYRNFSH
602 *****
603
604 PERTUNDA VAFIKSYLSRVVSPNGWVAWNKKNKVVEDTTRTILYLEYGNDGAGADTAGRVKWPGRVNLN
605 ZmPME3 VAFIKSYLSRVVSPNGWVAWNKKNKVVDTTTRTILYLEYGNDGAGADTAGRVKWPGRVNLN
606 *****: *****
607
608 PERTUNDA TDDEAIAYTADTFINASKWVPEPIQYVHTLGTAPPPRA
609 ZmPME3 TDDEAIAYTADTFINASKWVPEPIQYVHTLGTAPPPRA
610 *****
```

611 **Fig. S6.** Alignment of Pertunda and ZmPME3 proteins with Clustal Omega.

612

613

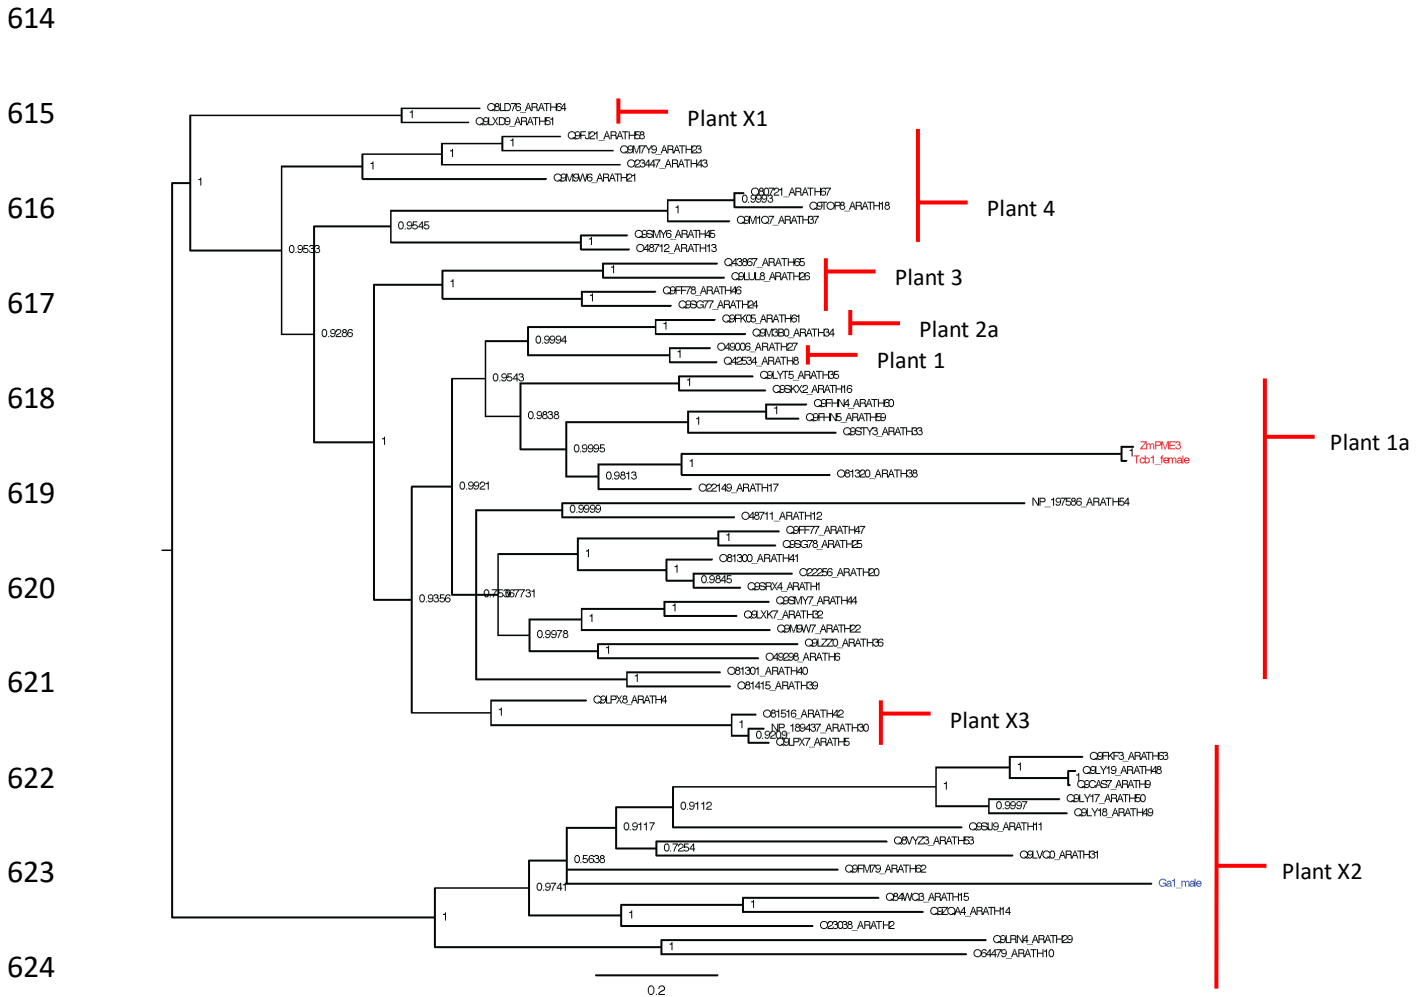

626 **Figure S7.** Phylogenetic tree of mature PME enzymes (predicted pre and pro domains removed)  
 627 of Arabidopsis PME proteins and predicted PME proteins encoded by cross-incompatibility loci  
 628 of *Zea mays*.

629

630

631

| Table S1. Haplotypes of the <i>tcb1</i> locus |                                        |                |                    |                  |
|-----------------------------------------------|----------------------------------------|----------------|--------------------|------------------|
| Haplotype                                     | Gene Content                           | Female Barrier | Pollen Penetration | Principal source |
| <i>Tcb1-s</i>                                 | <i>Tcb1-f (Pertunda)</i> <i>Tcb1-m</i> | +              | +                  | Teosinte         |
| <i>Tcb1-f</i>                                 | <i>Tcb1-f (Pertunda)</i>               | +              | -                  | Recombination    |
| <i>Tcb1-m</i>                                 | <i>Tcb1-m</i>                          | -              | +                  | Teosinte         |
| <i>tcb1</i>                                   | -                                      | -              | -                  | Maize            |

632

633



634

635

| Marker      | Primer sequences                                             | Marker types | Note                       |
|-------------|--------------------------------------------------------------|--------------|----------------------------|
| 053600      | FP: AGCAGGTGCCGCCCCG T<br>RP: AAGCGAGGGTTTGCTCGAT            | Indel        | <i>Tcb1-s</i> left border  |
| 444073 up8  | FP: GAGCAGGGTCAGCTGGAAGGAAC<br>RP: GGCATCTCTTGCTTGGCGGGC     | dCAPS        | <i>Tcb1-f</i> left border  |
| Gene 0.1 up | FP: GATAAGTTTGCAAGTGGCCCATCA<br>RP: AGAGATGTTCTGCAATGGGCCTA  | Indel        | <i>Tcb1-m</i> right border |
| 106164      | FP: GGCTGAAGCAGCAGAGCCATCCTAA<br>RP: CTGTGTGTGGGATCGGATCCCTA | Indel        | <i>Tcb1-s</i> right border |

636

637

638

639

640

641
